# Supplementary material for: Relation between Mechanical Hardening and Nitrogen Profile of PBII Nitrided Titanium Alloy
Source: MDPI journal article supplement (doi:10.3390/ma15249028), 2022-12-17

# Relation between Mechanical Hardening and Nitrogen Profile of PBII Nitrated Titanium Alloy

Valérie Parry <sup>1</sup>, Eric Le Bourhis <sup>2,\*</sup>, Luc Pichon <sup>2</sup> and Michel Drouet <sup>2</sup>

**Figure S1.** Reduced elastic modulus profiles for 3 treatments at 600 °C, 700 °C and 800 °C.

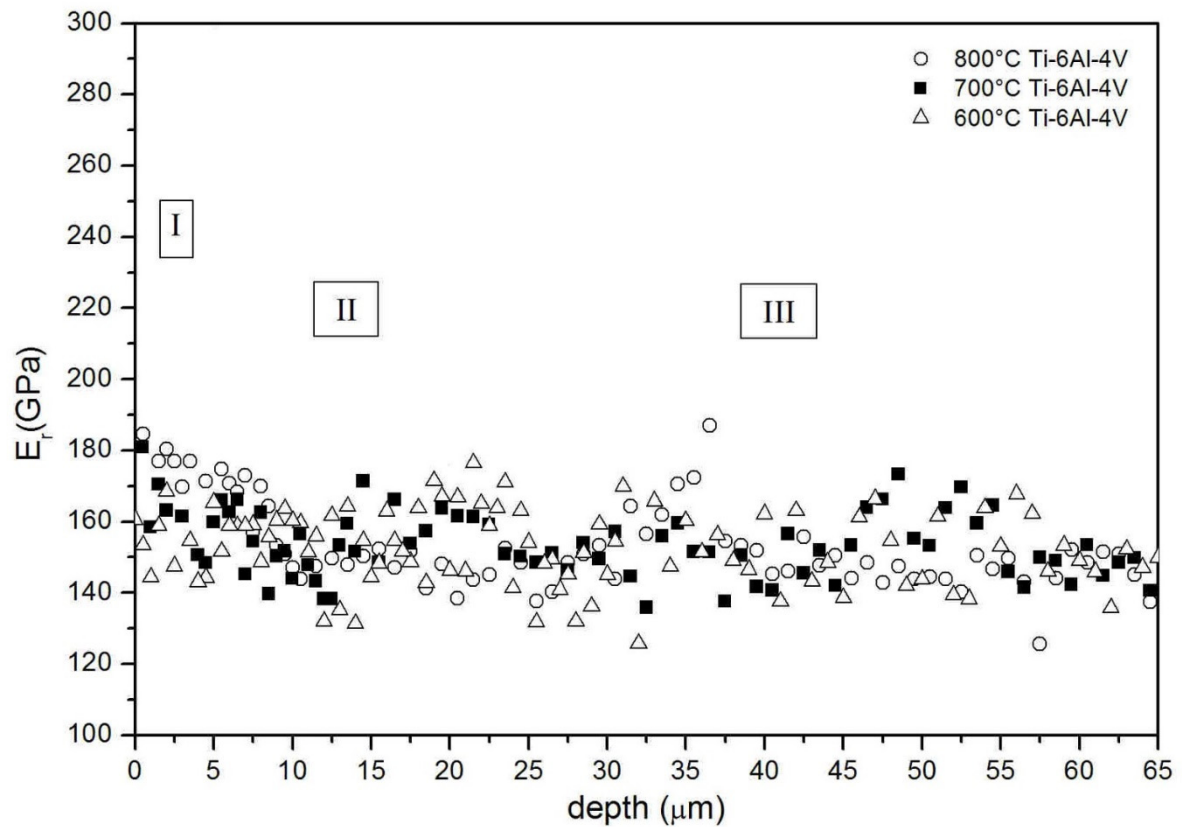

Supplement: s1 [file s1]
